# Supplementary material
Source: PubMed Central journal article supplement (PMC2567485)
Supplement: 0801497105_0801497105SI.pdf [file 0801497105_0801497105SI.pdf]

# Supporting Information

Blackburn *et al.* 10.1073/pnas.0801497105

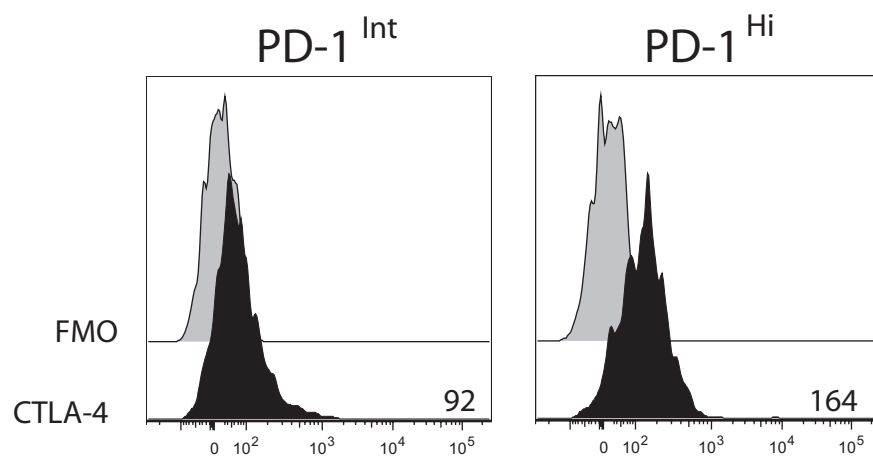

**Fig. S1.** CTLA-4 is more highly expressed on PD-1<sup>Hi</sup> CD8 T cells than on PD-1<sup>Int/Lo</sup> CD8 T cells. DbGP33-specific CD8 T cells from clone 13-infected mice (day 30 after infection) were costained with anti-PD-1 and anti-CTLA-4 and examined by flow cytometry. Numbers indicate mean fluorescence intensity.
